# Supplementary material for: Tunable translational control using site-specific unnatural amino acid incorporation in Escherichia coli
Source: PubMed Central journal article supplement (PMC4419535; doi:10.7717/peerj.904), 2015-04-28
Supplement: peerj-03-904-s001.pdf [file peerj-03-904-s001.pdf]

1 ACAAGTTTGT ACAAAAAAGC AGGCTATCAA AAAAATATTC TCAACATAAA  
 attL1 (3')  $P_{1pp}$

51 AAACTTTGTG TAATACTTGT AACGCTGCCA TCAGACGCAT TTCGAAGGAG  
Shine-Dargarno sequence

101 ATAGAACCAT **GTAG**GAAGGT AAGCCTATCC CTAACCCTCT CCTCGGTCTC  
**Translation start** **Amber** V5 epitope

151 GATTCTACGG TGAGCAAGGG CGAGGAGCTG TTCACCGGGG TGGTGCCCAT  
EGFP gene

201 CCTGGTCGAG CTGGACGGCG ACGTAAACGG CCACAAGTTC AGCGTGTCCG  
 251 GCGAGGGCGA GGGCGATGCC ACCTACGGCA AGCTGACCCT GAAGTTCATC  
 301 TGCACCACCG GCAAGCTGCC CGTGCCCTGG CCCACCCTCG TGACCACCCT  
 351 GACCTACGGC GTGCAGTGCT TCAGCCGCTA CCCCACCAC ATGAAGCAGC  
 401 ACGACTTCTT CAAGTCCGCC ATGCCCGAAG GCTACGTCCA GGAGCGCACC  
 451 ATCTTCTTCA AGGACGACGG CAACTACAAG ACCCGCGCCG AGGTGAAGTT  
 501 CGAGGGCGAC ACCCTGGTGA ACCGCATCGA GCTGAAGGGC ATCGACTTCA  
 551 AGGAGGACGG CAACATCCTG GGGCACAAGC TGGAGTACAA CTACAACAGC  
 601 CACAACGTCT ATATCATGGC CGACAAGCAG AAGAACGGCA TCAAGGTGAA  
 651 CTTCAAGATC CGCCACAACA TCGAGGACGG CAGCGTGCAG CTCGCCGACC  
 701 ACTACCAGCA GAACACCCCC ATCGGCGACG GCCCCGTGCT GCTGCCCGAC  
 751 AACCACTACC TGAGCACCCA GTCCGCCCTG AGCAAAGACC CCAACGAGAA  
 801 GCGCGATCAC ATGGTCCTGC TGGAGTTCGT GACCGCCGCC GGGATCACTC  
 851 TCGGCATGGA CGAGCTGTAC AAGTAAGACC CAGCTTCTTT GTACAAAGTG  
attL2 (5')
