# Supplementary material for: Tunable translational control using site-specific unnatural amino acid incorporation in Escherichia coli
Source: PeerJ. 2015 Apr 28;3:e904. doi: 10.7717/peerj.904 (PMC4419535; doi:10.7717/peerj.904)
Supplement: Supplemental Information 1 [file peerj-03-904-s004.xlsx]

## Sheet: Sheet1
	EGFP fluorescence data (dose-response curve)
	Yusuke Kato
		Trial 1 (15 Apr 2014)				Trial 2 (16 Apr 2014)				Trial 3 (17 Apr 2014)
	IY(M)	Fluorescence (a.u.)	OD590	F/OD590	F/OD590-background	Fluorescence (a.u.)	OD590	F/OD590	F/OD590-background	Fluorescence (a.u.)	OD590	F/OD590	F/OD590-background	mean[F/OD590-background]	se	IY(M)
	0.003	2920	0.42	6952	6696	2598	0.44	5904	5733	2640	0.44	6000	5822	6084	307	0.003
	0.001	3532	0.45	7850	7593	3084	0.4	7709	7538	3131	0.37	8462	8285	7805	240	0.001
	0.0003	4060	0.48	8459	8203	3849	0.44	8748	8577	4324	0.45	9610	9432	8737	364	0.0003
	0.0001	4050	0.45	8999	8743	2952	0.37	7977	7806	4129	0.42	9831	9653	8734	533	0.0001
	3e-05	4240	0.47	9021	8765	3648	0.39	9355	9184	4425	0.42	10535	10357	9435	476	3e-05
	1e-05	3485	0.43	8104	7848	3384	0.42	8058	7887	4092	0.42	9743	9565	8433	566	1e-05
	3e-06	1922	0.4	4805	4549	2276	0.41	5550	5379	2614	0.44	5940	5762	5230	358	3e-06
	1e-06	1251	0.43	2910	2654	1251	0.42	2979	2808	1552	0.42	3696	3518	2993	266	1e-06
	3e-07	644	0.44	1464	1208	554	0.38	1459	1288	829	0.42	1974	1796	1431	184	3e-07
	1e-07	586	0.38	1542	1286	407	0.43	947	776	479	0.39	1228	1050	1037	147	1e-07
	3e-08	361	0.44	820	563	245	0.35	700	529	441	0.42	1051	873	655	109	3e-08
	1e-08	375	0.43	872	616	329	0.42	784	613	389	0.41	949	771	667	52	1e-08
	3e-09	338	0.45	752	496	293	0.39	751	580	445	0.44	1010	833	636	101	3e-09
	1e-09	302	0.44	686	430	279	0.38	734	563	320	0.4	800	622	538	57	1e-09
	0	324	0.56	579	323	290	0.39	743	572	450	0.42	1071	893	596	165	0
	Background1	105	0.41	256	0	92	0.54	171	0	92	0.52	178	0			Background1
	1. Results for a negative control strain (ΔMJR1, IY = 0)
