# Supplementary material for: Tunable translational control using site-specific unnatural amino acid incorporation in Escherichia coli
Source: PeerJ. 2015 Apr 28;3:e904. doi: 10.7717/peerj.904 (PMC4419535; doi:10.7717/peerj.904)
Supplement: Supplemental Information 2 [file peerj-03-904-s005.xlsx]

## Sheet: Sheet1
	EGFP fluorescence data (time-course)
	Yusuke Kato
	2015-01-30
	IY concentration (M)	3e-07				1e-06				3e-06				0.0001				0.003				Background (ΔMJR1, IY = 0)
	Time(min)	Fluorescence (a.u.)	OD590	F/OD590	F/OD590-background	Fluorescence (a.u.)	OD590	F/OD590	F/OD590-background	Fluorescence (a.u.)	OD590	F/OD590	F/OD590-background	Fluorescence (a.u.)	OD590	F/OD590	F/OD590-background	Fluorescence (a.u.)	OD590	F/OD590	F/OD590-background	Fluorescence (a.u.)	OD590	F/OD590	F/OD590-background
	0	41	0.17	241	118	41	0.17	241	118	41	0.17	241	118	41	0.17	241	118	41	0.17	241	118	27	0.22	123	0
	32	51	0.22	232	132	53	0.22	241	141	56	0.22	255	155	151	0.24	629	529	70	0.22	318	218	33	0.33	100	0
	63	85	0.32	266	161	103	0.32	322	217	185	0.32	578	473	481	0.37	1300	1195	214	0.31	690	585	39	0.37	105	0
	91	127	0.31	410	316	208	0.34	612	518	355	0.3	1183	1089	729	0.31	2352	2258	427	0.35	1220	1126	33	0.35	94	0
	122	210	0.4	525	427	321	0.39	823	725	533	0.39	1367	1269	1373	0.49	2802	2704	576	0.41	1405	1307	49	0.5	98	0
	153	231	0.32	722	612	370	0.34	1088	978	692	0.33	2097	1987	1394	0.37	3768	3658	706	0.38	1858	1748	57	0.52	110	0
	182	371	0.49	757	645	692	0.5	1384	1272	1209	0.45	2687	2575	1969	0.46	4280	4168	1289	0.55	2344	2232	67	0.6	112	0
