# Supplementary material for: Tunable translational control using site-specific unnatural amino acid incorporation in Escherichia coli
Source: PeerJ. 2015 Apr 28;3:e904. doi: 10.7717/peerj.904 (PMC4419535; doi:10.7717/peerj.904)
Supplement: Supplemental Information 4 [file peerj-03-904-s007.xlsx]

## Sheet: Sheet1
	EGFP fluorescence data
	Yusuke Kato
	2014-08-20
		trial 1			trial 2			trial 3
	Strain	Fluorescence (a.u.)	OD590	F/OD590	Fluorescence (a.u.)	OD590	F/OD590	Fluorescence (a.u.)	OD590	F/OD590
	complete set	238	0.23	1035	296	0.25	1184	301	0.23	1309
	ΔMJR1	58.7	0.37	159	63.8	0.36	177	70.2	0.44	160
	ΔEGFP + Lux	38.6	0.29	133	67	0.41	163	73.2	0.51	144
	ΔEGFP	41.5	0.27	154	45.5	0.29	157	40.8	0.26	157
		trial 1	trial 2	trial 3
	Strain	F/OD590	F/OD590	F/OD590	mean	se	significance (Welch's t-test)
	complete set	1035	1184	1309	1176	79	P<0.01				P<0.01	P<0.01
	ΔMJR1	159	177	160	165	6		ns (P>0.1)	ns (P>0.1)
	ΔEGFP + Lux	133	163	144	147	9				ns (P>0.1)
	ΔEGFP	154	157	157	156	1
